# Supplementary material for: Progesterone Signaling in Endometrial Epithelial Organoids
Source: Cells. 2022 May 27;11(11):1760. doi: 10.3390/cells11111760 (PMC9179553; doi:10.3390/cells11111760)
Supplement: Supplementary file 1 [file cells-11-01760-s001.zip › Tables S1-S3.xlsx]

## Sheet: TS1a
Gene Symbol	Fold-Change(E2+MPA vs. V)
AADACP1	6.04348
ABHD6	2.52321
ABITRAM	2.02348
ABLIM1	-2.48403
ACBD3-AS1	27.3943
ACBD7	4.14715
ACER2	-2.00742
ACKR3	-6.44892
ACP3	2.40345
ACSBG1	8.46296
ACSL4	2.60513
ACSL5	2.35202
ACSS2	2.35661
ADAMTS1	-4.04134
ADAMTS10	-5.06032
ADAMTS15	3.20918
ADAMTS17	-2.10222
ADAMTS9	-2.24439
ADCY5	-3.28829
ADCYAP1R1	312.944
ADGB	359.824
ADGRF1	-5.5209
ADGRF2	-2.45235
ADGRF4	-3.34577
AGAP11	-3.29481
AGBL2	21.6063
AGBL4	13.3564
AGPS	2.07523
AGR3	2.81225
AK1	2.26537
AK7	6.1538
AK8	5.6291
AK9	2.77021
AKAP14	57.6933
AKAP6	2.91505
AKAP7	2.27786
ALDH1A1	-3.81933
ALDH1L2	5.41252
ALDH3B1	2.29508
ALDH6A1	2.06728
ALK	-9.1129
ALKAL2	14.9109
ALMS1P1	2.80735
ALOX5	3.18562
ALPL	15.4423
AMH	-3.26262
AMOT	2.11264
AMPD3	2.09077
ANAPC1P6	2.21992
ANAPC4	8.82313
ANGPTL1	-16.8545
ANK1	-8.15077
ANK2	3.10445
ANKDD1B	4.65746
ANKFN1	8.39369
ANKK1	15.1891
ANKMY1	2.19139
ANKRD18A	2.47875
ANKRD35	11.2604
ANKRD42	2.43455
ANKRD44-AS1	382.614
ANKRD45	14.2023
ANKRD53	15.3965
ANKRD66	45.7699
ANKUB1	617128000
ANO1	4.34612
ANXA1	2.71058
ANXA4	-3.00137
ANXA8	8.61181
AP4B1	2.09069
APCDD1	2.30889
APCDD1L	-5.69787
APCDD1L-DT	-13.1399
APOBEC3D	-2.58008
APOBEC4	92.9701
APOL2	2.20026
APOL4	8.19267
AQP5	-9.02908
AQP6	-13.7787
AQP7	2.76465
AR	12.4352
ARF4-AS1	-152675
ARG2	2.23453
ARHGAP26	2.21911
ARHGAP42	-2.11229
ARHGEF26-AS1	7.95909
ARHGEF33	2.61449
ARL3	2.34438
ARL6	2.32455
ARLNC1	-4.50458
ARMC2	2.22301
ARMC3	5.5904
ARMC4	152.317
ARMCX2	2.13251
ARSL	-2.8945
ASB14	60.6191
ASCL2	-5.35554
ASNS	15.0852
ASS1	2.29191
ATF3	4.07697
ATG9B	3.93014
ATP10A	-2.38615
ATP10B	-2.01227
ATP2A3	-132.893
ATP2B2	16.5545
ATP6V0E2-AS1	2.47423
ATP6V1C2	25.513
ATP9A	-2.49754
ATRIP-TREX1	2.05965
AXIN2	2.0029
B3GALT1	-18.9149
B3GALT5	-2.64652
B3GNT5	2.27922
B4GALNT1	-4.02535
BAALC	2.27441
BAALC-AS1	7.8101
BAHCC1	-2.41536
BBC3	-2.16379
BBOF1	5.47842
BBS5	3.23488
BCAR3	2.00172
BCAT1	-2.03918
BCL11B	-22.4437
BCL2	2.08808
BCL2L15	2.00726
BCO2	3.30762
BDNF	-2.68209
BEST4	25.0962
BHLHE41	5.30363
BMF	-4.83356
BMP4	-5.05164
BSCL2	3.7413
BTC	2.00123
BTG3	6.93855
BTNL9	8.96415
BVES	8.20191
C10orf95	4.73024
C11orf16	117.52
C11orf52	3.80695
C11orf97	36.4811
C14orf132	5.22922
C15orf65	5.24075
C17orf67	2.29215
C17orf77	4.20558
C17orf97	3.75301
C19orf18	8.43495
C1orf158	180.481
C1orf189	9.31337
C1orf194	371.538
C1orf21	-2.16895
C1orf87	76.9497
C1QTNF8	9.17725
C20orf85	453.235
C21orf58	3.22766
C22orf15	164.112
C22orf23	35.4856
C2CD2L	2.47236
C2CD4A	-2.07337
C2orf50	38.8429
C2orf73	85.4578
C2orf81	2.8105
C2orf88	6.97455
C4BPA	-18.7312
C4orf47	3.18149
C4orf54	46.9914
C5orf49	80.0904
C5orf66	-2.58346
C6	27.7414
C6orf118	84.7429
C6orf99	2.54517
C7orf57	35.4121
C8orf34	3.86857
C8orf34-AS1	3.96554
C9orf116	7.48982
C9orf135	27.399
C9orf24	52.066
C9orf72	2.048
CA2	4.54921
CABCOCO1	10.6385
CACNA1D	-3.30706
CACNG6	10.0118
CALCA	-60.14
CALCB	-9.44581
CALML4	2.13864
CAMK1D	-4.35659
CAMP	16.6427
CAPN12	2.87173
CAPN13	-7.45885
CAPN5	-3.36089
CAPS	6.73244
CAPSL	158.341
CASC21	6.08591
CATIP	6.55809
CC2D2A	3.35589
CCAT1	3.05907
CCDC103	3.94568
CCDC113	13.068
CCDC114	41.2696
CCDC121	3.52971
CCDC13	11.4106
CCDC146	4.14914
CCDC148	3.05887
CCDC151	52.9792
CCDC153	9.82597
CCDC157	3.49096
CCDC160	5.39244
CCDC162P	10.8622
CCDC169-SOHLH2	5.17938
CCDC17	19.1334
CCDC170	55.2482
CCDC171	2.84077
CCDC173	10.4066
CCDC175	7.63166
CCDC180	565570
CCDC181	40.1042
CCDC183	-2.02638
CCDC187	85.7721
CCDC188	37.7834
CCDC189	3.46946
CCDC30	2.16526
CCDC39	267.814
CCDC40	4.05917
CCDC60	6.85816
CCDC65	33.5083
CCDC69	9.97164
CCDC74A	6.64501
CCDC78	103.531
CCDC81	22.4126
CCDC85A	10.2653
CCDC89	21.5152
CCDC96	29.495
CCN2	2.75286
CCN3	5.60187
CCNA1	16.5807
CCNE1	2.50386
CCR9	-34.6713
CD164L2	263.634
CD200	23.1588
CD34	10.0747
CDC20B	200.541
CDC25B	-2.14026
CDH26	3.97193
CDHR3	220.185
CDHR4	245.545
CDK14	-2.22556
CDK20	2.93644
CDKN2B	2.0553
CDKN2B-AS1	3.22623
CDR2	3.06024
CEACAM6	-3.44936
CECR3	-3.27908
CELP	4.1053
CENPI	2.02374
CEP126	6.23899
CEP41	2.13137
CEP70	2.94164
CEP85L	2.27018
CERKL	5.94246
CES3	-2.8069
CES5AP1	-69.2559
CFAP100	271.049
CFAP126	84.5697
CFAP157	16.2855
CFAP161	101.194
CFAP206	7.66536
CFAP221	2.10346
CFAP251	3.12525
CFAP298	3.97598
CFAP299	173.021
CFAP300	6.00789
CFAP43	17.0792
CFAP45	32.8489
CFAP46	39.6167
CFAP47	54.404
CFAP52	202.269
CFAP54	24.6216
CFAP57	10.399
CFAP58	44.3925
CFAP61	27.3515
CFAP65	104.766
CFAP69	2.89626
CFAP70	4.1527
CFAP73	31.7385
CFAP74	171.268
CFAP77	51.819
CFAP92	355433
CFAP94	6.93205
CFAP99	50.2412
CGNL1	-3.36088
CHGA	26.2186
CHPT1	3.26255
CHRM3	-2.15942
CHRNA1	-8.74276
CHST10	2.34002
CHST2	-5.424
CHST4	5.32141
CHST5	8.82974
CHST6	6.07339
CIBAR2	154.836
CISTR	-7.61
CKB	3.67339
CKMT2	20.9658
CLBA1	2.05568
CLDN22	118.165
CLDN24	65.2269
CLGN	24.0094
CLIC6	2.89246
CLU	-2.18993
CNGA4	89.4069
CNKSR3	2.33637
CNR1	-49.449
CNTRL	2.8224
COBL	2.1489
COL1A2	23.0437
COL21A1	12.2187
COL23A1	-2.55964
COL25A1	-5.40993
COL4A4	-2.08746
CPAMD8	-5.67897
CPE	3.21411
CPLANE2	2.28653
CPM	41.0677
CPNE8	-2.73477
CPXM2	-3.13981
CR1L	2.59261
CRACR2A	-3.38326
CRISPLD1	20.1859
CRMP1	-11.1295
CROCC	2.48469
CROCC2	235.356
CRYBG1	2.53399
CRYBG3	2.01972
CRYZL1	9153.11
CSAG1	-10.6716
CSPP1	2.01408
CSRP2	3.90099
CTH	4.37482
CTTNBP2	-2.27587
CUEDC1	2.40123
CWH43	6.31995
CYB5D1	2.44594
CYB5R1	2.62725
CYB5R2	4.08649
CYGB	6.15399
CYP1A2	-9.82099
CYP1B1	2.15051
CYP26B1	-19.7506
CYP2B6	-4.91129
CYP3A5	-3.48127
CYP3A7	-4.77117
CYP4B1	9.57035
CYRIA	2.34558
CYS1	-3.35366
CYTH3	2.18221
DAB2	3.39274
DACT2	-2.44502
DANT1	-2.59211
DAPK1	-2.03105
DAPP1	2.2195
DAW1	26.1329
DCDC1	7.45344
DENND2A	-28.6116
DENND2C	1011150000
DENND6B	2.6695
DEUP1	35.0338
DGKE	2.52956
DGKH	3.04928
DHRS3	-2.86306
DIRAS2	2.40017
DIRC3	-2.51168
DIXDC1	3.2716
DKK1	-2.61392
DLEC1	19.486
DLG5	2.07274
DLG5-AS1	8.9619
DLGAP1	12.5638
DLX6-AS1	-2.53753
DMD	2.60315
DNAAF1	34.6873
DNAAF3	6.19335
DNAAF4	7.42281
DNAAF6	14.7947
DNAH10	91.196
DNAH11	5.45819
DNAH12	105.583
DNAH2	12.2205
DNAH3	54.2877
DNAH5	4.13987
DNAH6	17.924
DNAH7	4.85817
DNAH9	119.39
DNAI1	248.229
DNAI2	116.188
DNAI3	40.7072
DNAI4	3.83177
DNAJA4	3.10432
DNAJB13	2.55578
DNAJC15	2.4125
DNAL4	2.44505
DNALI1	3.55087
DNER	2.16182
DNM3	-2.01629
DOCK10	-3.79779
DOCK8	-3.795
DONSON	59.0524
DPP4	-2.50975
DPY19L1	2.14978
DPY19L2	2.63232
DPY19L2P1	8.0486
DPY19L2P2	7.91854
DPYD	-2.43216
DRC1	47.8867
DRC3	8.9113
DRC7	45.6913
DTHD1	377.127
DUOX1	33.5515
DUOX2	2.63925
DUOXA1	27.7621
DUSP18	2.62639
DUSP19	2.98176
DUSP4	-2.1007
DYDC1	42.5388
DYDC2	19.6078
DYNLRB2	27.6302
DYRK3	2.68702
DYSF	-13.6163
DZANK1	2.15026
DZIP1	2.71574
DZIP1L	3078.31
DZIP3	2.66431
E2F7	2.17823
ECEL1P2	131.227
ECHDC3	2.05678
ECT2L	34.4375
EDA	3.82018
EDA2R	-2.33525
EDAR	-2.86771
EEF1A2	-3.79951
EFCAB1	121.921
EFCAB10	99.2653
EFCAB12	25.1389
EFCAB6	2.53377
EFHB	39.8696
EFHC1	4.69955
EFHC2	9.43662
EFL1P1	2.6275
EFNB3	-2.22593
EGR3	13.3073
ELL3	3.90988
ELOVL7	2.14735
ELP3	2.60953
ENC1	-3.02008
ENDOG	2.34854
ENKUR	62.5189
ENO4	6.13369
ENPP1	3.10082
ENPP2	19.0017
ENPP3	88.2304
ENTPD1	-3.34738
EP300-AS1	9.70894
EPB41L2	3.70909
EPHA4	-3.77944
EPHB1	-6.74719
EPHB2	-2.29074
ERBB4	2.05475
ERICH2	2.81129
ERICH3	223.453
ERICH5	2.81489
ERICH6-AS1	3.83314
ERN2	-7.27031
ERP27	3.56983
ERRFI1	2.18116
ESAM	-2.7776
ETFBKMT	4.56801
ETNK2	2.20062
ETV1	-3.6294
EVA1A	2.28748
EVC	-2.18578
EXOC3L4	-8.10553
EYA2	2.47742
FABP6	194.172
FAIM	3.00863
FAIM2	-4.85593
FAM110C	2.6832
FAM124A	-4.60125
FAM124B	6.77081
FAM131B	-2.94521
FAM13C	15.1365
FAM155A-IT1	5.50276
FAM166B	86.3504
FAM167A	-3.28861
FAM174A	2.0555
FAM181A-AS1	6.42087
FAM182B	6.59111
FAM183A	301.966
FAM189A2	38.6213
FAM20A	-2.23344
FAM20C	-6.5265
FAM216B	470.468
FAM229B	6.53483
FAM3D	-60.5122
FAM47E-STBD1	4.77403
FAM76A	2.00555
FAM81A	2.58406
FAM81B	43.6196
FANK1	2.64259
FAR2P2	5.12451
FAXC	3.58993
FBLN1	2.83671
FBN2	-11.6885
FBXL13	2.68482
FBXL7	135.606
FBXO15	3.80902
FBXO17	-13.1514
FBXO32	-3.50514
FBXW9	2.58437
FCGBP	-4.49003
FCGR1A	-4.69706
FCRL2	4.86656
FER1L4	-2.27026
FETUB	18.1276
FGD5	-110.94
FGF14	31.3184
FGF14-IT1	22.1645
FGF18	-2.32714
FGFBP2	-12.0093
FGL1	22.9888
FHAD1	9.89593
FIGNL2	-21.2524
FILIP1	2.09968
FKBP5	4.04913
FKBPL	2.13389
FLACC1	2.58794
FLG-AS1	-3.43621
FLJ44635	5.49186
FLRT1	-5.33542
FLRT3	-3.92956
FLT3LG	-18403.8
FMN2	40.0263
FMOD	-4.72334
FOXB2	71.3362
FOXD2-AS1	5.24492
FOXD4L4	-13.7007
FOXJ1	4.85359
FOXN4	95.4169
FRMPD2	8.77083
FRRS1L	11.4933
FRZB	-9.81847
FSD1L	2.37611
FSIP1	5.97739
FSTL3	2.35431
FUT3	7.72821
FUT5	4.09993
FUT6	8.14634
FZD10-AS1	-2.10179
G6PC2	-27.0613
GABBR1	-2.04174
GABRP	8.9969
GABRQ	-71.4364
GACAT2	-2.49373
GAD1	2.09514
GAL	11.6795
GAL3ST1	-3.73997
GALC	2.5395
GALNT10	2.32954
GALNT14	-3.38107
GALNT18	-2.42874
GALNT4	2.30289
GALNT9	-4.28247
GAS2L2	50.6679
GATA2	3.46257
GATA3	-4.44661
GBP5	15.8658
GCLC	2.22185
GCLM	3.48796
GCNT4	2.63494
GFRA1	-11.6894
GGT1	-4.37474
GGT2	-2.30828
GGTA1	10.6211
GJB2	2.76137
GJB6	3.05607
GLB1L	4.28041
GLP1R	-6.7718
GMNC	278.014
GNG11	4.24351
GOLGA7B	-8.22042
GON7	2.53012
GPATCH11	2.09007
GPR156	2.73209
GPR157	2.23158
GPR162	29.7327
GPRC5A	-2.37188
GPRIN3	4.3211
GPX3	-2.93631
GRAMD1B	-2.73899
GRB14	-2.66473
GREB1	31.9752
GREB1L	3.53775
GRK4	2.02819
GSTA3	35.2641
GTF2IP7	-3.46484
GUCY1A1	2.2156
GUCY1B1	2.24938
GUCY1B2	-2.19703
GULP1	2.16738
H3P4	30.1396
HABP4	2.05055
HACD1	2.40187
HACD4	4.26003
HCAR1	-2.61651
HCP5	2.00263
HEY1	7.87951
HHLA2	7.84492
HIPK1	2.00787
HIVEP1	2.13697
HLA-DOB	5.00167
HLF	-3.9835
HMCN1	-7.33669
HMGA2-AS1	-4.67653
HMGCR	2.53803
HNMT	-2.23566
HOATZ	92.1315
HOMER2	3.96969
HOXA3	-3.83761
HOXB9	2.08578
HOXC4	10.2949
HPSE	-6.64196
HS3ST1	-2.33045
HSD11B2	4.34912
HSD17B2	5.81148
HSPA4L	2.15661
HSPB8	3.2374
HUNK	-3.89288
HYDIN	9.29605
HYDIN2	198.08
ID1	-4.4972
ID2	-2.70545
ID3	-4.71383
IDO1	3.43747
IDO2	3.50603
IDS	2.39024
IFI30	-2.01956
IFT122	2.02673
IFT172	2.65991
IFT22	2.34084
IFT27	2.26576
IGF2	-20.5567
IGFBP6	-3.10976
IGFBP7	4.35578
IGFBPL1	10.3007
IGSF11	2.10723
IL18R1	2.18055
IL1A	-3.60599
IL1B	-4.05976
IL1R1	2.30625
IL1R2	2.98928
IL1RAP	2.89801
IL33	14.0531
IL4I1	-2.64549
IL4R	2.16189
IL5RA	173.997
IL6R	3.05584
INHBB	4.62229
INPP4B	3.53576
IPCEF1	6.78388
IPO11-LRRC70	-4.21197
IQCD	2.33835
IQCG	5.98042
IQCH	2.71244
IQGAP2	5.4399
IQUB	17.3351
IRAG1-AS1	19.11
IRAIN	9.29644
IRAK2	-3.25887
IRF5	-3.0273
IRF6	2.14561
IRF8	2.39506
ITGA1	4.09109
ITGA10	2.08678
ITGA9	24.1373
ITGAL	7.88937
ITGB6	2.0099
ITM2A	-12.5195
ITPRID1	2.2708
JAG1	3.65541
JCAD	2.03185
JHY	3.96402
KATNB1	2.09338
KBTBD12	2.55142
KBTBD4	2.10901
KBTBD6	2.41392
KCCAT198	-2.05169
KCNB1	22.5367
KCNE1	88.9013
KCNE1B	160.865
KCNG1	57.1732
KCNH3	7.58356
KCNIP1	-6.10755
KCNIP3	-10.3644
KCNJ2	33.8061
KCNK13	8.20104
KCNK6	2.51372
KCNMB4	-4.39165
KCNN3	9.8418
KCP	-5.06104
KDM1B	2.04121
KHDRBS3	2.67622
KIAA0319	25.5571
KIAA0825	2.35441
KIAA2012	46.8364
KIF12	-3.61633
KIF17	18.0029
KIF19	41.0333
KIF21B	-2.06931
KIF24	2.3696
KIF6	3.06675
KIF7	-4.65699
KIF9	3.87599
KITLG	-2.64142
KLB	10.1242
KLHDC9	2.78593
KLHL3	2.03217
KLHL32	4.12855
KLHL6	52.4932
KLK14	6.8032
KLLN	2.0477
KLRK1-AS1	4.23342
KMO	8.50445
KNDC1	23.326
KRT13	6.60594
KRT3	-8.67012
KRT4	-88.204
KRT5	35.4743
KRT6A	20.1749
LAMA1	7.74895
LAMA2	13.6887
LAMA4	2.43517
LAMB4	6.43214
LAMC1	-2.29688
LAMP3	4.37741
LBH	2.99648
LBHD1	3.26843
LCA5	2.04781
LCA5L	22.7776
LCAL1	5.73804
LDB3	7.8292
LDLRAD1	9.72139
LDLRAD4	5.22309
LEKR1	2.2908
LEMD1	-4.13368
LETM2	2.7873
LFNG	-2.1089
LGSN	5.78838
LHFPL3-AS2	-6.53591
LIN37	2.00512
LINC00167	-2.92121
LINC00488	3.28381
LINC00511	-2.8285
LINC00535	13.5101
LINC00639	27.4548
LINC00673	-3.27165
LINC00866	-3.39464
LINC00882	8.86172
LINC00887	-6.21506
LINC00930	3.36567
LINC00937	8.01578
LINC00970	-3.18467
LINC01014	24.782
LINC01091	3.25906
LINC01170	3.44244
LINC01237	-2.44238
LINC01250	-2.18294
LINC01342	-3.27008
LINC01392	28.3015
LINC01411	4.02064
LINC01480	70.0829
LINC01541	2.76319
LINC01588	3.43122
LINC01594	-6.09537
LINC01659	-13.285
LINC01797	-13.5306
LINC01799	-3.6686
LINC01812	-2.12824
LINC01819	-11.644
LINC01828	-5.14255
LINC01829	-4.67018
LINC01913	-3.71486
LINC02015	-4.55829
LINC02018	2.71576
LINC02038	-3.24374
LINC02197	-2.11988
LINC02198	2.38057
LINC02223	-2.86339
LINC02351	-4.30806
LINC02418	-6.78275
LINC02516	-2.45061
LINC02582	-2.4757
LINC02618	8.91245
LMLN	2.64085
LMNTD1	205.029
LMO3	-2.49786
LMO4	-2.20779
LOC100126784	15.8237
LOC100128361	-8.3654
LOC100129534	4.09163
LOC100505841	22.0893
LOC100506124	3.13415
LOC100506258	-2.96234
LOC100506730	3.47949
LOC100507053	3.91745
LOC100507250	-2.83598
LOC100507351	-3.32099
LOC100507412	-2.16002
LOC101927066	2.07577
LOC101927267	26.846
LOC101927318	-10.3814
LOC101927661	-4.85441
LOC101928118	8.26105
LOC101928841	6.21466
LOC101929555	7.54419
LOC101929622	12.4784
LOC101929626	2.31485
LOC102723313	6.28102
LOC102724163	3.13252
LOC102724488	-13.1721
LOC102724532	2.22801
LOC102724596	3.12545
LOC102724788	-3.79046
LOC102725191	20.8481
LOC105369147	2.0744
LOC105369199	-3.01935
LOC105369212	-5.85872
LOC105369438	6.0823
LOC105369921	10.632
LOC105370361	140.271
LOC105370401	-12.3771
LOC105371267	3.6572
LOC105371899	3.7768
LOC105373156	-2.22386
LOC105374389	-8.44176
LOC105377458	-2.37102
LOC105377785	2.05677
LOC105379807	-2.08251
LOC107001062	3.26865
LOC117779438	-3.81897
LOC145694	5.41797
LOC158434	3.84448
LOC284581	-17.0111
LOC339803	2.78381
LOC388780	10.0863
LOC728392	4.93519
LOC91548	74.8175
LONRF2	2.1441
LOXL1	2.84945
LRGUK	6.55433
LRP11	2.1534
LRP2BP	7.81717
LRP4	-10.6367
LRRC10B	66.6734
LRRC18	14.6021
LRRC23	12.6542
LRRC31	-6.11325
LRRC32	-14.7507
LRRC34	38.1083
LRRC43	11.3412
LRRC46	44.0696
LRRC49	2.20317
LRRC6	2.76211
LRRC63	30.6883
LRRC66	-3.04152
LRRC71	131.489
LRRC73	7.76084
LRRC74B	35.7534
LRRC75A	-3.25122
LRRC8C-DT	-6.53183
LRRIQ1	7.91222
LRRK2	-8.80876
LRRN1	-2.29285
LRTOMT	5.02498
LRWD1	2.57923
LTF	6.12783
LTN1	5.57487
LY6K	11.1642
LYPD1	-2.74091
MAB21L4	2.00473
MAF	-8.33515
MAGED4	-2.27315
MAGED4B	-2.27315
MAK	11.7848
MALL	-2.56273
MAOA	2.10761
MAOB	6.81554
MAP1A	43.2038
MAP1B	3.63434
MAP2	7.14476
MAP3K12	-2.10771
MAP3K19	105.522
MAP6	18.6561
MAPK10	7.29569
MAPK15	3.96916
MAPK8IP1	3.4573
MAPRE3	3.04637
MARCHF10	14.0073
MARK1	4.07279
MAT1A	26.9185
MB	10.2359
MBP	2.37565
MCTP1	6.67385
MCTP2	-2.10052
MDH1B	8.58676
MDM1	2.20348
ME1	2.16147
MEGF11	-2.74215
MEIG1	3.02357
MEIS1-AS3	-3.59398
METTL9	2.07188
MFAP3L	3.60988
MFAP5	10.1106
MFNG	3.47959
MFSD2A	2.63052
MGAT3	4.90252
MGLL	4.42987
MGST1	2.7536
MINDY4	2.0402
MIR22HG	2.50114
MIR3142HG	-13.5101
MIR3648-1	-3.46146
MIR3648-2	-3.46146
MIR4436B1	3.89437
MIR4436B2	3.89437
MIR6724-1	-14.3824
MIR6724-2	-14.3824
MIR6724-3	-14.3824
MIR6724-4	-14.3824
MIS18A	11.368
MKX	25.8778
MLF1	3.7709
MLPH	3.43532
MMP1	-67.6007
MMP10	-61.3565
MMP12	-4.88352
MN1	4.8374
MND1	2.10881
MNS1	5.04864
MNX1	-9.24073
MOGAT1	5.08726
MOK	2.54686
MORC4	2.14223
MORN3	8.7035
MORN5	75.9439
MOSPD1	2.29295
MOV10L1	4.04989
MPPED2	3.78235
MROH3P	-2.72037
MROH9	15.6487
MRPL23-AS1	-25.7113
MS4A8	107.368
MT1F	2.81764
MT2A	2.28296
MTMR8	3.54928
MTNR1A	-2.11302
MYB	2.24097
MYCBPAP	30.2964
MYH14	3.22952
MYLK	2.21111
MYO7B	-9.40048
MYOCOS	4.55804
N4BP3	-2.70434
N6AMT1	23.8278
NAAA	2.81716
NAT1	2.06716
NAV2	2.78507
NCAM1	-3.47221
NDP	29.0845
NDRG2	3.60082
NEK1	2.13104
NEK10	7.74069
NEK11	2.82365
NEK5	3.88341
NELL2	-19.3529
NFKBIZ	-2.29295
NHLRC1	2.2953
NHSL2	8.08884
NID2	2.37754
NME5	3.09045
NME9	4.03553
NNMT	3.17838
NOD2	5.70235
NOS1	2.02798
NOSTRIN	-7.74442
NPAS3	53.0755
NPC1L1	-2.69957
NPEPL1	2.14562
NPHP1	3.98611
NPIPB8	-3.98466
NPNT	-6.30958
NPPC	9.29395
NPR1	-2.47771
NPSR1-AS1	15.8305
NPTX2	52.5422
NQO1	5.90326
NR2F1-AS1	-2.662
NR2F2-AS1	-2.24096
NR4A3	8.0316
NRAD1	17.1489
NRADDP	10.011
NRARP	2.87364
NRAV	3.03191
NRCAM	3.35055
NRG2	4.64342
NRG4	5.91182
NRTN	10.1664
NRXN3	2.52971
NTF3	-4.04209
NTN1	2.80733
NTNG1	-6.84586
NUP62CL	3.04968
NWD1	6.65678
NXNL2	14.31
NYAP2	-2.16547
NYNRIN	-3.05232
OBSCN	-2.0861
OGDHL	-2.01302
OIT3	-2.31869
ONECUT2	-9.13411
OPRK1	2.03657
OR1F1	2.75455
OR1Q1	6.78352
OR7E47P	49.7076
OSCP1	3.36533
OTULINL	-6.86433
OVOL1	-4.68786
OXR1	2.59737
P4HA2	2.09385
PACRG	13.7685
PAG1	-6.97999
PAK5	41.3518
PALLD	2.64149
PAMR1	30.478
PANX2	7.73737
PAQR4	2.54744
PARD3	-2.00652
PARD6G-AS1	2.33873
PART1	50.1416
PAX2	-2.84574
PCAT14	-5.55243
PCAT19	44.7787
PCAT29	28.1618
PCCA-DT	2.57723
PCDH1	-2.15707
PCDH19	-2.00946
PCYT1B	27.1549
PDE4D	-2.80398
PDE4DIP	16870
PDK3	-2.10699
PER1	3.7845
PET117	2.12448
PFKM	-2.05587
PGBD5	-4.39395
PGLYRP4	-5.6632
PGM5	-8.42153
PGR	209.821
PGR-AS1	43.5185
PHACTR3	-2.22616
PHLDB2	-3.1172
PHYHIPL	3.3797
PI3	8.79503
PIFO	41.0501
PIH1D2	4.56824
PIK3AP1	-3.20657
PIK3CG	-9.69755
PIM2	3.10916
PIWIL1	-5.31501
PKDCC	-8.99578
PKHD1	-2.34974
PKHD1L1	391.345
PKP2	2.15687
PLA2G4A	2.37102
PLAAT2	11.1857
PLAC8	4.50372
PLB1	12.4059
PLCB1	2.11111
PLCE1	3.989
PLCL2	-2.87675
PLCXD2	-2.46722
PLEKHB1	2.41006
PLEKHS1	9.90836
PLG	23.6901
PLIN2	4.65992
PLK4	2.1956
PLPPR3	45.6918
PLSCR2	-2.07215
PLXDC2	30.8635
PLXNA4	-46.4008
PNMA1	2.59896
PNMA8A	2.09522
PNPLA3	2.02309
POC1B	2.33058
PODXL	3.63476
POLR2I	2.16909
POPDC3	3.46426
POU5F1	2.95819
POU5F1B	3.55217
POU5F1P4	6.14849
PPARG	3.46202
PPIL6	5.83005
PPM1E	17.5825
PPP1R15A	2.14731
PPP1R32	9.82842
PPP1R36	4.86409
PPP1R42	12.469
PRKAG2	3.08571
PRKCA	-3.70528
PRKD1	-2.4519
PRKX	3.89611
PRKY	3.89763
PRODH	-3.79052
PROM1	-2.81714
PROM2	-2.33249
PROS1	4.13726
PRR15	3.12736
PRR18	4.15972
PRRX2	-2.70592
PRSS12	2.95854
PRUNE2	2.76406
PRXL2A	2.17836
PSD3	-2.65387
PSENEN	3.41126
PSORS1C2	27.101
PSORS1C3	3.05067
PTAFR	-2.17334
PTCHD4	-7.46198
PTGER2	4.19626
PTGS1	3.36857
PTGS2	11.8067
PTPRM	2.61452
PTPRT	13.0001
PXDC1	-2.40771
PXDN	-2.53835
QPCT	-2.27417
RAB31	2.83893
RAB36	3.70784
RAB42	11.1303
RAET1L	3.70839
RAMP2	86.5973
RANBP17	3.36585
RANGRF	3.06604
RAP1GAP	-3.5138
RARG	-3.41136
RASA3	-2.10222
RASA4DP	3.2812
RASAL1	-2.06773
RASGEF1B	2.95999
RASGEF1C	-3.9853
RASL12	5.41269
RASSF10	-4.97908
RASSF4	5.97532
RASSF8-AS1	6.06095
RBBP7	2.30582
RBBP8	2.5387
RBBP8NL	-2.4614
RBFOX3	-2.35377
RBM24	98.7102
RCAN2	-2.71203
RD3	5.57178
RDH10	-3.05565
REPS2	14.5548
RERG	14.1592
RFX2	5.96443
RGS14	2.25729
RGS16	8.75484
RGS22	134.988
RGS7BP	13.5312
RHBDL2	-2.23761
RHOBTB1	3.05925
RHOU	2.2702
RIBC1	13.7493
RIBC2	4.01289
RILPL2	3.62396
RIPOR2	4.16548
RNA45SN1	-4.34521
RNA45SN5	-4.34521
RNF150	2.11384
RNF180	3.75473
RNVU1-19	-7.88398
ROPN1L	91.5318
ROR1	-3.75251
ROR2	-2.23042
RORA	-2.93433
RP1	9.10919
RPGR	2.74097
RPGRIP1L	2.21264
RRAD	735.137
RRAGD	3.26789
RSPH1	12.8748
RSPH10B	2.64634
RSPH10B2	2.64634
RSPH14	31.5652
RSPH3	2.28048
RSPH4A	264.48
RSPH9	25.2342
RTCA-AS1	3.58289
RUBCNL	4.81225
RUNDC3B	5.47312
RUNX1	-2.10934
RUNX3	5.2677
RWDD2B	18.0076
RXRG	-4.2271
S100A1	-3.44695
S100A4	-2.83746
SACS	2.19442
SALL4	-4.82236
SAMD11	-6.13887
SAXO2	11.7766
SCARA3	-2.90414
SCEL	-2.11771
SCGB1D2	92.6342
SCGB1D4	246.596
SCGB2A1	6.26619
SCGB2A2	5.44968
SCIN	-2.96036
SCNN1B	6.93363
SCNN1G	3.51297
SCPEP1	-2.85386
SCTR	-169.98
SCTR-AS1	-32.7558
SDK2	86.6858
SEC14L5	8.578
SEC14L6	-2.33731
SELENBP1	-2.54462
SELENOP	6.66189
SEMA4B	-2.45503
SEMA5A	-2.79606
SEMA6A	-4.51301
SEMA6C	-8.44971
SERPINA1	3.14074
SERPINA3	22.4579
SERPINA4	13.2065
SERPINA5	68.2053
SERPINA6	64.3947
SERPINB9P1	2.10241
SERPINF1	5.99699
SERTM1	3.31488
SGSM1	-2.15184
SH3PXD2A	-2.59289
SH3RF3	-2.45055
SHC4	-5.20622
SHISA3	-3.7724
SIAH3	40.1681
SIGLEC15	-19.1456
SLAIN1	3.80912
SLC14A1	-191.338
SLC14A2-AS1	-10.5057
SLC15A2	6.46103
SLC16A10	-5.28351
SLC16A12	-4.06909
SLC1A1	-3.46519
SLC1A2	32.4315
SLC1A4	2.52543
SLC22A17	-5.82853
SLC22A3	-2.06144
SLC22A4	2.37077
SLC22A5	2.28887
SLC23A1	118.543
SLC25A35	6.59184
SLC26A2	5.85957
SLC26A9	-3.26236
SLC30A1	2.6042
SLC31A2	4.08882
SLC35D2	2.57679
SLC35G1	2.32903
SLC36A4	3.06135
SLC38A4	-4.80463
SLC38A5	7.37299
SLC39A14	5.31569
SLC39A8	3.73294
SLC3A1	3.02984
SLC46A2	23.0801
SLC46A3	5.27391
SLC49A3	3.81039
SLC51B	17.2586
SLC5A4	4.12271
SLC5A9	3.92624
SLC66A3	2.21451
SLC6A12	-4.30108
SLC6A20	-5.08929
SLC7A2	4.65823
SLC7A5	4.36729
SLC7A6	2.51744
SLC7A8	-8.68831
SLC8A1	-6.8468
SLC9A3R1	2.10015
SLC9C2	24.5516
SLCO1B3	2.83972
SLCO3A1	-3.52267
SLCO4A1	-2.40563
SMAD3	-2.46507
SMIM1	-3.19578
SMIM3	-3.75664
SMIM31	-2.50869
SMIM5	4.58732
SMIM6	4.9621
SMOC2	-3.07522
SNCA	9.44493
SNCAIP	12.2015
SNHG26	2.06009
SNHG4	12.9946
SNORA13	-7.49198
SNORD13B-1	-2.3467
SNORD13B-2	-2.3467
SNTB1	-2.03031
SNTN	256.066
SNX25	-2.02828
SNX30	2.23529
SOBP	-10.6772
SOX30	9.43817
SOX5	2.0196
SOX9	-2.09578
SPA17	4.89266
SPACA9	5.07956
SPAG1	2.5028
SPAG16	2.04757
SPAG17	48.6907
SPAG6	187.854
SPAG8	29.6785
SPATA13	4.28861
SPATA17	4.12458
SPDYA	4.43744
SPEF1	35.546
SPEF2	5.97367
SPINK5	4.07843
SPIRE2	2.03905
SPNS2	-2.98094
SPOCK3	-27.3589
SPP1	3.67439
SPRYD3	2.10565
SPTSSB	6.80552
SRD5A2	11.1233
SRD5A3	2.98317
SRGAP2	-2.38869
SRGAP2B	-2.01098
SRGAP2C	-2.29919
SRGAP3-AS2	683.645
SRXN1	2.08215
SSPOP	-2.89417
SSTR1	-26.686
SSTR2	-2.86312
ST6GAL2	-3.78619
ST6GALNAC2	5.57137
ST8SIA1	-24.8887
ST8SIA6	77.3018
STAG3	6.32183
STARD13	2.00961
STEAP4	23.4419
STIL	2.00967
STIMATE-MUSTN1	3.81197
STK33	4.47624
STMND1	57.8754
STOM	2.01019
STOML3	35.501
STOX1	4.51937
STPG1	2.91628
STUM	2.50317
STX2	2.12541
SUGT1P4-STRA6LP	-42.5541
SULT1C4	-5.19397
SULT1E1	84.7417
SULT2B1	10.9484
SUSD2	2.09236
SUSD3	-5.13233
SVOPL	3.77848
SYBU	14.306
SYNDIG1	-50.584
SYNE1	8.09009
SYNJ2BP-COX16	2.19059
SYNM	3.04392
SYT11	-2.41108
SYT14	6.7261
SYT5	37.5363
TACC1	3.90664
TAP2	2.15582
TBC1D3	-3.46481
TBC1D4	5.06474
TCF7	4.39497
TCTE1	36.9173
TCTEX1D1	211.984
TCTEX1D4	167.641
TEKT1	338.818
TEKT2	12.9681
TEKT3	19.0489
TEKT4	113.982
TESC	-2.31059
TESMIN	2.52736
TEX26	13.0713
TFCP2L1	7.96869
TFPI	-2.36072
TFPI2	6.65875
TGFB2	-11.5353
TGFB2-AS1	-26.2086
TGFB2-OT1	-8.94808
TGFBI	-10.4011
TGM5	-7.48923
TGM7	-2.53316
THBS4-AS1	-3.23188
THSD7B	9.67966
TIAM2	2.06204
TIMP3	-3.42663
TLE2	-4.91421
TLL2	-7.13329
TLR6	4.21351
TLR8-AS1	7.67731
TMCO5A	9.31118
TMEM100	-12.2483
TMEM120B	2.0934
TMEM145	-4.25915
TMEM158	-3.22679
TMEM169	-2.38664
TMEM17	4.79997
TMEM177	2.49201
TMEM190	311.132
TMEM200A	21.8963
TMEM200C	24.9057
TMEM221	-2.7765
TMEM229B	2.87655
TMEM231	5.37989
TMEM232	10.7185
TMEM252	-6.38788
TMEM254	2.20467
TMEM272	-4.77076
TMEM273	2.73371
TMEM35A	-14.9298
TMEM37	-4.51653
TMEM40	7.91813
TMEM50B	279.258
TMEM67	2.25427
TMPRSS13	-3.98214
TMPRSS2	-2.22187
TMSB15B	-2.69146
TMTC1	2.41139
TNFAIP8L1	9.82534
TNFRSF10C	-2.35848
TNFRSF11B	-3.00183
TNFRSF19	6.08225
TNFSF14	3.63544
TNIK	-2.61432
TNNC1	3.13945
TNNT1	-2.62508
TNNT3	3.48267
TNS1-AS1	-3.95655
TOGARAM2	118.751
TOX3	-2.93796
TP53AIP1	9.39811
TP53I11	-2.88912
TP73	15.9121
TPPP3	145.462
TPTE2P1	-8.74627
TRABD2B	-7.60731
TRIM17	2.62059
TRIM2	2.04855
TRIM25	2.0436
TRIM55	26.8554
TRMT9B	2.19482
TRPC1	-2.01261
TSNAXIP1	10.1904
TSPAN11	5.00085
TTC16	20.3252
TTC21A	4.86343
TTC23L	8.44692
TTC25	8.73599
TTC26	2.55497
TTC29	60.723
TTC30A	2.86847
TTC30B	3.12715
TTC39C-AS1	2.91804
TTC41P	4.28921
TTLL10	7.54197
TTLL9	39.2188
TUB	28.1913
TUBA1A	3.45051
TUBA3FP	30.6412
TUBA4A	-2.20134
TUBA4B	219.447
TUBB2B	2.22567
TUNAR	39.3259
TUSC8	-2.77996
UBXN10	3.55664
UCKL1-AS1	12.9729
UGT2B7	2.93766
ULK4	2.30786
UMODL1-AS1	28.4514
UNC5B	2.40192
UNC79	2.96256
UNC93A	6.01509
USP2	35.053
USP53	2.03235
UST	-4.10957
VASH1	-4.08016
VAV3	-3.41462
VGF	-6.00186
VLDLR-AS1	-2.50191
VMAC	2.85528
VNN2	-12.3652
VSIG1	-4.46265
VSIG8	38.6841
VWA3A	113.457
VWA5B2	31.235
VWA7	3.22078
VWA8	2.01236
WDFY2	2.63383
WDR38	187.107
WDR54	2.68619
WDR86	-2.60333
WDR86-AS1	5.31796
WDR93	16.5057
WEE2-AS1	2.61071
WHRN	2.27503
WNT10A	-8.73862
WNT4	-4.07198
WNT7B	-4.07927
WTAPP1	-12.1785
XACT	-3.012
XK	3.06131
XPR1	2.05848
YRDC	2.02321
ZBTB46	-3.48095
ZC2HC1C	4.60415
ZC3H12D	-2.9484
ZDHHC1	2.45007
ZDHHC11	3.70341
ZDHHC11B	3.15772
ZDHHC8P1	-6.94011
ZDHHC9	2.12351
ZFAND2A	2.03125
ZMIZ1-AS1	-2.10379
ZMYND10	86.1996
ZMYND12	26.3708
ZNF273	2.36661
ZNF295-AS1	109.205
ZNF382	2.11049
ZNF385D	-3.69788
ZNF391	3.62478
ZNF423	-5.69497
ZNF474	32.8962
ZNF487	2.66666
ZNF584	2.34333
ZNF589	2.19929
ZNF660-ZNF197	-2.78655

## Sheet: TS1b
Gene Symbol	Fold-Change(E2+MPA vs. V)
A1BG	4.48901
ACAA1	6.30793
ACBD3	9.11483
AKAP10	5.92056
AKIP1	7.08852
ALDH6A1	5.00609
ALKBH4	2.6922
AMN1	3.41505
AMY1A	5.19314
AMY1B	5.19396
AMY1C	5.19407
ANKRD44	20.7712
ANTXR1	4.83999
ARMC9	5.98183
ATP11A	4.58718
ATP6V1FNB	-2.86865
ATXN7L1	15.8012
B4GALT3	3.28994
BAALC	2.54523
BAALC-AS2	5.22903
BBOX1-AS1	9.23831
BRD3	2.59528
BVES-AS1	2.14338
C15orf39	7.78486
CACNA1C-AS1	18.6269
CASP7	19.9441
CASTOR3	4.36481
CATIP-AS1	8.40607
CCDC28A	11.6481
CCDC78	4.54166
CCDC92	6.37112
CCNA1	6.12176
CD46	3.87907
CDCA7L	5.39468
CEP72	6.92183
CERKL	11.9206
CFAP20DC-AS1	4.40159
CLEC16A	4.51563
CLEC19A	3.10788
CLEC4A	2.9767
CORO7	-2.54361
CRACDL	2.89205
CYP20A1	3.62096
DDX54	7.59857
DELEC1	9.87578
DENND1A	17.444
DMAC2L	2.83676
DNAAF4-CCPG1	2.59612
DSCC1	3.51136
DUOXA2	13.6196
DYDC2	4.52202
DYNLL1	2.89215
EFCAB6-AS1	4.8299
ELOA	2.62345
EMC3-AS1	3.43097
EPB41	2.54511
EPSTI1	9.85311
EPX	4.008
ERICH3-AS1	8.46633
ESR1	5.23927
EXPH5	5.07921
EYA2	4.40353
FAM167A-AS1	-2.10605
FAM181A	3.59574
FAM185A	3.025
FAM3D-AS1	-2.88162
FAM47E	3.69338
FAM78B	3.68197
FASTKD3	12.5316
FBXO22	5.41428
FCGR1A	6.66312
FER1L6	14.9062
FGF14	2.33619
FHAD1	5.28511
FHAD1-AS1	3.75804
FKBP11	6.62816
FKBP15	2.70052
FOXN3	8.32465
FRMD3	4.95343
GFAP	3.94861
GFM1	2.1238
GLB1L2	-2.03298
GPR135	5.77604
GPR55	4.36979
GRHL3	4.16417
HSD17B10	25.6425
ICAM2	95.9112
IGFBP7-AS1	13.8328
IL10RB-DT	-2.99293
INSIG1	2.27682
IQCH-AS1	2.91103
IRF1-AS1	3.34169
ITGA4	6.81258
ITGB3	4.765
KCND2	6.65019
KCTD4	3.2585
KIAA1656	4.68718
KIAA2012-AS1	22.6612
KIF19	3.06134
KIF1B	4.99262
KIF9-AS1	5.10517
KLHL2	3.59735
KRTCAP3	2.63579
KSR1	8.18123
LCLAT1	-2.32134
LINC00242	14.5906
LINC00539	2.56525
LINC00637	4.47932
LINC01693	9.28584
LINC01722	10.1632
LINC02056	9.16489
LINC02225	12.512
LOC100128568	7.63698
LOC100129175	17.1443
LOC101928627	6.19815
LOC101929294	-3.89771
LOC102724084	9.99444
LOC102724708	-2.09462
LOC105369391	4.86429
LOC105371855	12.4035
LOC105373021	2.53879
LOC442028	7.56703
LOC643339	5.46346
LOC648987	3.04701
LOC729732	2.59583
LRCOL1	109.173
MDM2	2.72014
MFSD6	-2.02064
MIR4713HG	11.2165
MLPH	3.3506
MOBP	30.0829
MYDGF	4.86797
MYLK-AS1	9.075
NAA38	2.30713
NF1	12.414
NFAT5	3.03957
NOXRED1	6.54945
NPR2	16.2432
NPSR1	5.2848
NPY4R	2.05937
NRAP	2.78051
NUDT22	4.53219
PAK2	7.56546
PAPOLA	8.10852
PAQR5	5.68722
PCSK5	3.86994
PHKG2	5.0185
PIAS1	2.53291
PINX1	8.63247
PIP5K1B	-3.72046
PKD1L2	6.6868
PLA2G4E-AS1	5.01664
PLB1	21.1496
PLXNB1	3.49146
PMEPA1	-4.7671
POLR1B	2.08175
POMGNT1	4.32151
PRKAR2A	2.44183
PRSS54	8.39512
PTRH1	12.8056
R3HDML	16.7509
RAB40C	6.48753
RASGRF1	6.63222
RECQL5	3.39071
REX1BD	22.6244
RGL1	9.28106
RGL2	2.85451
RINT1	7.62136
RNF157-AS1	5.50223
RNF40	3.30578
RPH3AL	-8.93705
RPL23AP82	3.06897
RPL35	7.02813
S100A9	-2.73917
SAPCD1	9.36185
SCIMP	2.17333
SDHC	7.96014
SEC14L4	10.7723
SH3BGRL3	5.54171
SLC12A7	2.25518
SLC25A45	23.612
SLC35E4	4.18399
SLC51B	5.70663
SMARCB1	3.97021
SNAI3-AS1	-2.16142
SNHG16	6.43605
SPOUT1	2.16986
SREBF2	3.70636
SRGAP3	8.25554
STK39	3.15711
SYN2	5.81713
SYN3	-2.42706
TAF1C	9.50786
TBC1D17	-5.24318
TCP11X1	5.80512
TCP11X2	5.80512
TEX9	9.48152
THAP7-AS1	4.96166
THBS3	6.63885
TMEM151B	14.4147
TMEM204	2.36961
TMEM25	2.32632
TNFRSF11B	-2.71442
TNNC2	17.1916
TP73	2.47455
TP73-AS1	9.47331
TRIM31-AS1	-4.7704
TSKU	4.94042
TSTD1	20.0276
TTC14	13.2542
UBASH3B	28.5311
UICLM	6.139
UPP1	-15.0459
URAHP	2.27729
VAC14	6.03096
WDFY4	14.3138
WDR3	6.77369
WDR86	4.74667
WDR87BP	3.54316
WTAPP1	-8.32802
YBEY	13.6405
ZFHX3	2.18364
ZNF132	2.55573
ZNF497	3.67433
ZSCAN25	-2.89633
ZUP1	8.85634

## Sheet: TS1c
Gene Symbol	d1 Fold-Change(E2+MPA vs. E2)
ADAMTSL1	-9.66806
ANK2	-2.02553
AQP1	-2.50298
ASNS	962.744
C8orf37-AS1	-2.52509
CCDC169-SOHLH2	-2.37396
CD109	-3.55595
CD96	-3.30076
CDH16	2.61482
CHGA	-2.19386
CLCA4	-5.14539
CLDN24	22.0793
CLEC4D	-2.40049
COPG2IT1	-2.14985
DEUP1	-2.14674
DISC1FP1	-3.26666
DPY19L2P1	-2.01571
ECT2L	-2.23738
EFNB3	-2.81627
ENPP3	4.06908
FLJ44635	-2.15108
FLT3LG	-17404.5
FUT3	2.48745
GAS2	-2.29375
GASK1A	-2.36554
GJB6	3.12516
GLI3	-2.65768
GRK3	-2.09518
GRK4	-2.59607
HHATL	-2.88161
HS3ST3B1	-5.61815
HSD17B3	-3.33119
ITGA10	-2.34431
JAKMIP2-AS1	-3.31471
KRT6A	5.69156
LINC01392	-3.07774
LINC01668	-212.235
LINC02762	-2.38319
LOC100507250	-4.85193
LOC101928118	-2.13979
LOC101929555	-2.06141
LOC107001062	-2.17528
LOXL4	-3.11754
LPAR3	-4.54523
LRP2BP	-2.12097
LRRIQ3	-3.16446
LRRIQ4	-2.7176
MAFB	5.90867
MAOB	-2.36307
MFNG	-2.02094
MN1	-2.00537
MRAS	-3.80504
NHEG1	-3.64535
NHSL2	-2.24377
NKPD1	-5.19518
NXPH3	-6.8168
OLFM4	-6.74999
P4HA3	-5.06508
PDE8B	-2.76104
PNMA8A	-2.06953
PPM1E	-2.12849
PRSS45P	-3.52519
RFLNB	-2.15327
RFX3-AS1	-2.16
SDK2	-2.81103
SERPINA3	2.52548
SERPINA5	2.00741
SH3RF3	-2.43618
SHC2	-2.91374
SLC47A1	-3.04679
SLC4A8	-2.43054
SLC5A9	-2.37736
SULT1C2	-3.0641
TNS1	-4.51083
UMODL1	-35.1226
UMODL1-AS1	-2.03949
UNC79	-3.15737
USHBP1	-2.61863
XACT	-3.18383

## Sheet: TS1d
Gene Symbol	d2 Fold-Change(E2+MPA vs. E2)
AKAP10	-2.36878
AVPR1B	-2.46474
BMPR1B-DT	-5.65961
CASP7	-2.22253
CD46	-2.03134
CDK5RAP2	-2.70871
DUOXA2	8.31861
EFCAB6-AS1	-2.0527
ESYT3	-3.55394
EXPH5	-2.06032
FCGR1A	-2.10966
FUT3	-4.73046
ITGA9-AS1	-2.48972
KSR1	-2.02152
LINC01089	-3.68179
LINC02056	-2.06179
NAXD	-2.77175
NDP-AS1	-2.16215
NPSR1	-2.25015
NTN1	-2.54225
OLFM2	-3.96487
PDIA6	-2.22373
PGR	-4.18067
PPP1R14C	-3.41076
RNF144A	-3.88367
SHISA6	-2.33681
SLC2A9	-4.83144
SSPN	-2.38351
STK39	-2.00893
TPRXL	-4.14559
ZNF350	-2.67965

## Sheet: TS1e
E2+MPA vs E2 DEG	donor 1: Fold-Change(E2 vs. V)	donor 1: Fold-Change(E2+MPA vs. V)	donor 2: Fold-Change(E2 vs. V)	donor 2: Fold-Change(E2+MPA vs. V)
ADAMTSL1	22.8509	2.36354	0	0
AKAP10	-1.08322	-1.03296	14.0245	5.92056
ANK2	6.28815	3.10445	-1.0908	-1.01996
AQP1	4.04981	1.61799	-1.47106	-1.33069
ASNS	-63.8206	15.0852	6.33814	3.25082
BMPR1B-DT	2.14874	1.89976	8.93295	1.57837
C8orf37-AS1	4.7925	1.89795	0	0
CASP7	-1.04197	1.13632	44.3264	19.9441
CCDC169-SOHLH2	12.2956	5.17938	0	0
CD109	9.9034	2.78502	0	0
CD46	-1.16466	1.0685	7.87972	3.87907
CD96	4.28364	1.29778	1.02362	1.24415
CDH16	-2.36608	1.10513	0	0
CDK5RAP2	1.25287	1.20267	4.98073	1.83878
CHGA	57.5199	26.2186	2.60519	-1.09166
CLCA4	12.9707	2.52085	0	0
CLDN24	2.95422	65.2269	2.07351	1.3951
CLEC4D	4.95062	2.06234	0	0
COPG2IT1	1.36888	-1.57052	-1.4786	1.33165
DEUP1	75.2086	35.0338	0	0
DISC1FP1	4.18957	1.28252	0	0
DPY19L2P1	16.2236	8.0486	2.03095	1.20236
DUOXA2	-2.09124	1.14333	1.63724	13.6196
ECT2L	77.0498	34.4375	1.957	1.26868
EFNB3	1.26521	-2.22593	2.24055	0
ENPP3	21.6832	88.2304	1.40055	1.15809
ESYT3	1.15079	1.20948	6.43804	1.81152
EXPH5	1.0494	1.03783	10.4648	5.07921
FCGR1A	-2.56033	-4.69706	14.0569	6.66312
FLJ44635	11.8134	5.49186	0	0
FLT3LG	-1.05742	-18403.8	0	0
FUT3	3.10688	7.72821	14.2975	3.02244
GAS2	1.40818	-1.62888	-1.36614	-1.25513
GASK1A	2.98411	1.26149	1.84493	-1.23011
GJB6	-1.02261	3.05607	2.38725	2.26257
GLI3	8.64576	3.25312	0	0
GRK3	3.49006	1.66576	0	0
GRK4	5.26532	2.02819	0	0
HHATL	34.3812	11.9312	0	0
HS3ST3B1	7.67851	1.36673	0	0
HSD17B3	10.2015	3.06241	0	0
ITGA10	4.89207	2.08678	0	0
ITGA9-AS1	-1.19476	-1.20964	3.28278	1.31853
JAKMIP2-AS1	3.99018	1.20378	0	0
KRT6A	3.54471	20.1749	0	0
KSR1	-1.35372	-1.29625	16.5385	8.18123
LINC01089	-1.61203	-1.53822	4.18068	1.1355
LINC01392	87.1047	28.3015	0	0
LINC01668	9.36605	-22.6601	2.03181	-1726.7
LINC02762	3.18823	1.3378	0	0
LOC100507250	1.71085	-2.83598	-1.34456	0
LOC101928118	17.677	8.26105	-19.4368	5.48698
LOC101929555	15.5517	7.54419	0	0
LOC107001062	7.11024	3.26865	0	0
LOXL4	12.7439	4.08781	-1.30066	1.59625
LPAR3	0	0	0	0
LRP2BP	16.58	7.81717	1.13649	1.47247
LRRIQ3	68288500	21579900	0	0
LRRIQ4	2.53985	-1.06999	1.01161	-1.56431
MAFB	-5.90626	1.00041	-2.43449	-2.34772
MAOB	16.1056	6.81554	0	0
MFNG	7.03205	3.47959	0	0
MN1	9.70078	4.8374	0	0
MRAS	3.86103	1.01471	0	0
NAXD	1.03346	1.03133	1.43595	-1.93026
NHEG1	4.96149	1.36105	0	0
NHSL2	18.1495	8.08884	4.25162	3.0183
NKPD1	26.0594	5.01607	9.07879	3.60634
NTN1	4.92797	2.80733	5.02944	1.97834
NXPH3	7.60421	1.11551	0	0
OLFM2	-1.1398	-1.51255	2.42778	-1.63312
OLFM4	516.199	76.474	0	0
P4HA3	11.626	2.29531	0	0
PDE8B	4.94142	1.7897	1.11936	-1.09966
PDIA6	-1.11248	1.16989	5.10402	2.29525
PGR	363.695	209.821	11.2446	2.68967
PNMA8A	4.33613	2.09522	-1.9983	-1.16566
PPM1E	37.4242	17.5825	2.19979	2.02754
PPP1R14C	2.88386	1.64624	11.669	3.42122
PRSS45P	12.0652	3.42256	0	0
RFLNB	3.23556	1.50263	0	0
RFX3-AS1	2.91905	1.35141	0	0
RNF144A	-1.0168	1.06898	5.12439	1.31947
SDK2	243.676	86.6858	0	0
SERPINA3	8.89255	22.4579	-1.58677	3.53745
SERPINA5	33.9767	68.2053	1.44874	-1.10954
SH3RF3	-1.0059	-2.45055	0	0
SHC2	5.43207	1.8643	0	0
SLC2A9	1.12449	-1.07021	7.70586	1.59494
SLC47A1	67.8129	22.2572	1.33591	-3.55962
SLC4A8	4.97193	2.04561	0	0
SLC5A9	9.33407	3.92624	-1.02939	1.08919
SSPN	1.66489	1.79954	3.8094	1.59823
STK39	1.27229	1.05198	6.3424	3.15711
SULT1C2	1.67524	-1.82905	0	0
TNS1	2.61284	-1.72641	0	0
UMODL1	4.47329	-7.85163	150.309	72.781
UMODL1-AS1	58.0265	28.4514	0	0
UNC79	9.35388	2.96256	0	0
USHBP1	9.17502	3.50375	1.35991	0
XACT	1.05705	-3.012	0	0
ZNF350	1.42318	1.24929	5.55871	2.07442

## Sheet: TS2a
46 direct genes	Donor 1 fold, E2 vs V	Donor 1 p-value	Donor 2 fold, E2 vs V	Donor 2 p-value
ADAMTS8	139.86	0.00444	1.71	0.0214
BAALC-AS1	7.48	0.00079	-1.1	0.91
C1QTNF6	3.03	0.00219	ND
CILP	49.1	0.00228	ND
CUEDC1	2.47	0.0084	ND
DCDC1	13	3.16e-05	ND
DHRS9	20.94	0.00487	3.77	0.0758
DOK7	2.96	0.00274	1.26	0.142
FAIM	3.75	0.000471	-1.82	0.28
FGL1	27.91	0.000151	ND
GREB1	36.5	0.000458	9.79	0.00165
HPAT5	-2.58	0.207	4.15	0.0018
IDO1	2.2	0.0143	0	0.257
LINC01101	5.64	0.00465	ND
LINC01342	-3.27	0.00472	3.07	0.286
LINC01693	19.2	0.00108	10	4.18e-05
LINC01812	-2.29	0.00772	ND
LINC01913	-5.88	0.00159	ND
LMO3	-2.44	0.00174	1.59	0.0175
LOC100128361	-7	0.00414	4.62	0.0793
LOC105370361	246.52	0.000761	0	0.625
LOC107001062	7.11	1.09e-05	ND
LOXL4	12.74	0.000159	-1.3	0.408
LUNAR1	3.14	0.00768	ND
MN1	9.7	1.32e-05	ND
MOGAT1	5.11	9.48e-05	ND
OSBPL11	2.03	0.000777	ND
OTUB2	2.65	0.00808	1.07	0.853
PLEKHS1	17.38	0.000688	1.88	0.408
PSORS1C3	2.42	0.00142	-1.82	0.547
RGS10	2.06	5.96e-05	1.56	0.34
RWDD1	1.27	0.0408	7.52	0.00134
SCGB1D2	69.22	0.00328	1.07	0.952
SERPINA1	4.35	0.00197	3.09	0.0224
SHANK1	28.72	0.000312	ND
SLAIN1	4.04	7.63e-05	ND
SLC14A1	-92.28	1.17e-06	-1.2	0.645
SLC25A45	1.43	0.181	29.19	8.31e-07
SLC7A2	2.9	0.000182	-1.31	0.873
TIPARP	2.44	0.000624	-1.46	0.577
TMEM229B	4.98	9.02e-05	1.16	0.726
TOM1	1.37	0.0766	3.22	0.000194
TYW5	-1.13	0.306	2.02	0.00135
UGT2B7	2.94	1.72e-05	1.53	0.254
WDR24	-1.01	0.969	2.45	0.0022
WDR92	2.12	0.000898	ND

## Sheet: TS2b
33 anchor/anchor genes	Donor 1	Donor 1	Donor 2	Donor 2
	fold, E2 vs V	p-value	fold, E2 vs V	p-value
ADAMTS8	139.86	0.00444	1.71	0.0214
ARHGAP26	2.77	1.7e-05	5.6	0.000106
ATP6V1C2	25.17	0.000362	-1.32	0.108
BHLHE41	5.26	0.000709	1.38	0.239
CA2	3.25	0.00763	1.55	0.564
CAMK2N1	-2.32	0.00158	ND
ENC1	-4.07	2.59e-06	2.13	0.0966
EYA2	2.88	0.00365	7.37	2.91e-06
FGF19	7.08	0.00499	ND
GAD1	2.3	0.00127	2.08	0.101
GREB1	36.5	0.000458	9.79	0.00165
IGF1R	1.58	0.00763	5.27	6.46e-05
IRAIN	14.04	3.47e-05	1.08	0.818
KCNJ2	55.27	0.000436	ND
KCNMB4	-3.36	0.00871	ND
KIF26B	-1.1	0.726	4.59	9.89e-05
KLLN	2.1	0.00325	-1.65	0.229
LINC01812	-2.29	0.00772	ND
LINC02225	ND		16.34	9.15e-05
LIPA	1.57	0.000168	4.64	0.000864
LOC101927571	5.76	0.00823	ND
LOC101928266	15.43	0.00349	4.99	0.0235
MEIS1	-2.31	2.86e-05	-1.01	0.949
MEIS1-AS3	-3.84	9.49e-05	1.55	0.485
NTN1	4.93	0.000314	5.03	4.42e-05
RWDD1	1.27	0.0408	7.52	0.00134
S100G	1.59	0.476	2.32	0.00178
SCNN1G	4.73	5.09e-05	-2.16	0.41
SLCO3A1	-3.13	0.00121	7.56	0.000998
STK24-AS1	1.51	0.467	3.48	0.000514
TGFB2	-14.07	0.000763	ND
TGFB2-AS1	-11.04	6.15e-05	-2.06	0.0431
TIPARP	2.44	0.000624	-1.46	0.577

## Sheet: TS2c
53 anchor/span genes	Donor 1	Donor 1	Donor 2	Donor 2
	fold, E2 vs V	p-value	fold, E2 vs V	p-value
ADCYAP1R1	437.41	0.000584	3.2	0.0309
AMN1	1.59	0.0348	4.24	5e-05
ARHGAP26	2.77	1.7e-05	5.6	0.000106
C8orf34	3.93	4.9e-05	3.05	0.00914
CDKN2B-AS1	4.87	0.000126	-1.02	0.827
CFAP251	4.37	0.000152	3.77	0.0109
CLU	-2.46	0.00468	-1.76	0.0454
COBL	2.48	0.0027	ND
CPM	49.6	1.52e-05	7.12	0.0132
DIXDC1	4.5	8.67e-05	ND
EFCAB2	2.95	0.00154	ND
ESR1	1.74	0.00381	6.45	2.33e-05
ESRRB	-3.79	0.015	ND
EYA2	2.88	0.00365	7.37	2.91e-06
FGF19	7.08	0.00499	ND
FYB2	2.14	0.000915	ND
IL1R2	2.81	0.00847	ND
ITGB3	-1.77	0.0322	5.45	0.000349
KCNIP3	-700000000	0.00023	ND
KCNMB4	-3.36	0.00871	ND
KRT86	2.47	0.0227	2.5	0.000157
LEKR1	4.15	1.54e-05	ND
LINC01812	-2.29	0.00772	ND
LINC-PINT	2.08	0.00248	2.21	0.000213
MBP	2.46	0.00103	3.28	7.51e-05
NCAM1	-3.27	0.000206	ND
NCKAP5	2.12	0.000984	ND
NRTN	14.38	0.000637	1.78	0.173
NTN1	4.93	0.000314	5.03	4.42e-05
OR7E47P	85.08	0.000161	1.15	0.528
PANK1	1.25	0.00604	2.49	0.0023
PAPSS2	2.28	0.00423	-1.3	0.249
PARD3	-1.91	0.00728	15.31	1.36e-05
PBX4	2.52	0.0108	ND
PDIA6	-1.11	0.513	5.1	7.8e-06
PDZK1P1	6.05	0.0151	-1.08	0.695
PDZRN3	-2.02	0.0147	ND
POC1B	2.46	0.000169	1.28	0.0794
PRR29	33.95	0.0055	-1.02	0.887
RBBP8	2.4	0.000381	-1.23	0.693
RDH10	-2.73	2.73e-05	-1.82	0.0548
RFX3	2.41	0.00032	ND
SCNN1G	4.73	5.09e-05	-2.16	0.41
SHC4	-4.73	0.00316	-1.41	0.00383
SHROOM3	2.02	0.000194	ND
SLC1A2	57.62	0.000482	ND
SLC3A1	2.5	0.0173	1.04	0.857
SLC7A2	2.9	0.000182	-1.31	0.873
SLCO3A1	-3.13	0.00121	7.56	0.000998
ST8SIA6	48.85	0.00108	3.11	0.00122
STX18	2.06	0.00102	1.45	0.425
THSD4	2.08	0.00362	-1.16	0.396
THSD7B	13.88	7.95e-05	ND
TLL2	-7.51	0.00576	ND
TRABD2B	-3.2	0.00358	ND
UGT2B7	2.94	1.72e-05	1.53	0.254
VWA3A	191.57	1.93e-05	ND

## Sheet: TS2d
166 span/anchor genes	Donor 1 fold, E2 vs V	Donor 1 p-value	Donor 2 fold, E2 vs V	Donor 2 p-value
ACBD3	1.06	0.57	10.15	0
ADAMTS1	-10.4	0	ND
ADAMTS6	24.95	0.01	ND
ADAMTS8	139.86	0	1.71	0.02
ADGRF1	-7.59	0	ND
APOA5	ND		7.71	0
ARHGAP26	2.77	0	5.6	0
ARMC3	9.1	0	ND
ARRDC3-AS1	2.05	0.01	-1.6	0.05
ATP1B1	-2.33	0	1.12	0.67
ATP6V1C2	25.17	0	-1.32	0.11
AXDND1	3.6	0.01	ND
BCL11B	-19.4	0	ND
BHLHE41	5.26	0	1.38	0.24
BMPR1B-DT	2.15	0.08	8.93	0
C10orf105	ND		3.99	0
C11orf97	44.85	0	1.9	0.68
C1orf194	449.81	0	ND
C2orf50	59.69	0	1.52	0.69
C4orf19	-1.75	0.03	6.06	0
CA2	3.25	0.01	1.55	0.56
CAMK2N1	-2.32	0	ND
CASC2	3.21	0	ND
CCDC148	4.78	0	ND
CCDC28A	1.18	0.38	15.24	0
CCDC85A	5.27	0	ND
CCDC90B	1.05	0.04	5.19	0
CCND2	7.73	0	ND
CD164L2	344.14	0	ND
CEP70	3.47	0	ND
CFH	4.36	0	ND
CLU	-2.46	0	-1.76	0.05
COL12A1	2.36	0	ND
COL1A2	25.46	0	1.24	0.71
COL1A2-AS1	7.77	0.01	ND
CTH	3.42	0.01	ND
DGKH	3.59	0	1.04	0.81
DLL1	2.61	0.03	5.35	0
DUSP4	-3.18	0	3.18	0
EDAR	-2.75	0	1.68	0.04
ENC1	-4.07	0	2.13	0.1
EPHA4	-6.23	0	-1.35	0.23
EPHB2	-2.5	0	ND
EVA1A	3.06	0	2.73	0.15
EYA2	2.88	0	7.37	0
FAM120B	1.19	0.07	4.37	0
FAM76A	2.09	0	ND
FGF19	7.08	0	ND
FHOD3	2.33	0	1.14	0.14
FOXD2-AS1	6.33	0	ND
FYB2	2.14	0	ND
GAD1	2.3	0	2.08	0.1
GALNT4	2.23	0	ND
GATA3	-2.7	0	ND
GJA1	5.6	0	ND
GJA4	139.11	0.01	24.13	0.02
GPRC5A	-3.51	0	-3.92	0.16
GREB1	36.5	0	9.79	0
GUCY1A1	2.12	0	ND
H19	-3.01	0.08	-27.62	0
HES2	3.28	0	1.01	1
HS3ST3B1	7.68	0	ND
HSD17B2	4.54	0.01	7.03	0
IFT81	2.14	0	ND
IGF1R	1.58	0.01	5.27	0
IHH	123.53	0	0	0.59
IL1R2	2.81	0.01	ND
IL6R	3.13	0	1.91	0.06
INHBB	6.88	0	3.43	0.01
INPP4B	3.01	0	ND
IQCA1	2.45	0	ND
IRAIN	14.04	0	1.08	0.82
ITGA9	45.33	0	1.02	0.87
JAG1	4.73	0	1.87	0.02
KCNJ2	55.27	0	ND
KHDRBS3	2.9	0	ND
KIAA1656	-1.06	0.84	6.6	0
KIF17	26.79	0	ND
KIF26B	-1.1	0.73	4.59	0
KLF6	1.45	0.01	7.15	0
KMO	8.55	0	1.22	0.06
LINC00887	-6.3	0	0	0.13
LINC01301	5.22	0	ND
LINC01411	3.59	0.01	2.54	0.02
LINC01812	-2.29	0.01	ND
LINC01829	-5.01	0	-3.83	0.01
LINC02225	ND		16.34	0
LINC02289	15.48	0.01	3.09	0.11
LOC100506124	4.33	0	0	0
LOC101927571	5.76	0.01	ND
LOC101927661	-4.59	0	ND
LOC101928266	15.43	0	4.99	0.02
LOC101928414	-1	0.99	3.59	0
LOC105370361	246.52	0	0	0.62
LOC105371855	ND		15.37	0
LOC388780	15.02	0	1.87	0.02
LRRC8C	-2.77	0	ND
LRRC8C-DT	-5.18	0	ND
LRTOMT	7.19	0	-1.1	0.35
MAP2	9.53	0	ND
MAP3K19	155.75	0	-1.88	0.17
MEIS1	-2.31	0	-1.01	0.95
MEIS1-AS3	-3.84	0	1.55	0.48
MIR100HG	2.91	0	ND
MN1	9.7	0	ND
NCKAP5	2.12	0	ND
NEK9	1.51	0.01	3.27	0
NLRP1	-2.6	0.01	ND
NPR1	-5.92	0	1.27	0.66
NR2F2-AS1	-2.4	0	2.25	0
NR4A2	5.99	0	0	0.27
NRARP	3.3	0	-1.41	0.51
NTN1	4.93	0	5.03	0
ODF2L	2.04	0	ND
ONECUT2	-10.8	0	ND
OPTC	ND		3.61	0
OVOL2	3.97	0.01	1.65	0.05
PACRG-AS3	ND		13.63	0
PARVB	1.24	0.28	2.35	0
PCAT14	-3.68	0	-1.33	0.7
PCAT29	55.98	0	ND
PCAT7	1.24	0.63	7.29	0
PINX1	1.83	0	8.22	0
PIWIL1	-7.83	0	-3.62	0.06
PLCB1	2.55	0	ND
PLXNA4	-91.06	0	ND
POC1B	2.46	0	1.28	0.08
PPM1J	3.21	0	ND
PRKCH	-1.1	0.49	3.07	0
PRSS56	10.64	0	ND
PTPRE	1.76	0.02	15.13	0
RAB42	12.05	0.01	-1.15	0.85
RAP1GAP	-2.96	0	ND
RBPMS	-2.01	0.01	1.22	0.09
RDH10	-2.73	0	-1.82	0.05
RGS16	14.2	0	1.2	0.85
RNF150	2.58	0	ND
ROR2	-1.97	0.01	4.66	0
S100G	1.59	0.48	2.32	0
SAXO1	2.43	0.01	1.07	0.76
SCNN1G	4.73	0	-2.16	0.41
SEC14L1	2.92	0	3.36	0.01
SEMA4A	-2.12	0.01	ND
SEMA6A	-2.83	0	1.07	0.44
SLC14A1	-92.28	0	-1.2	0.64
SLC22A4	3.13	0	2.26	0.01
SLC30A1	2.31	0	-1.26	0.02
SLC51B	20.91	0	10.11	0
SLC5A9	9.33	0	-1.03	0.92
SLC7A2	2.9	0	-1.31	0.87
SLCO3A1	-3.13	0	7.56	0
SNHG20	-13.53	0	ND
SPATS2	1.1	0.67	9.5	0
SPINK1	-10.13	0.01	ND
STPG1	3.68	0	ND
TCTEX1D1	309.03	0	ND
TGFB2	-14.07	0	ND
TGFB2-AS1	-11.04	0	-2.06	0.04
TIPARP	2.44	0	-1.46	0.58
TTC7A	2.59	0	2.05	0
TYW5	-1.13	0.31	2.02	0
VNN2	-10.54	0	-1.72	0.52
WNT4	-2.97	0.01	ND
XPR1	2.3	0	ND
ZDHHC8P1	-3.87	0	-1.63	0.62
ZNF407	-1.04	0.42	3.51	0

## Sheet: TS3
15 E2+MPA vs E2 DEG all 4 PGR/gene interactions	donor 1: Fold-Change(E2 vs. V)	donor 1: Fold-Change(E2+MPA vs. V)	donor 2: Fold-Change(E2 vs. V)	donor 2: Fold-Change(E2+MPA vs. V)
BMPR1B-DT	2.14874	1.89976	8.93295	1.57837
CDH16	-2.36608	1.10513	0	0
ECT2L	77.0498	34.4375	1.957	1.26868
HS3ST3B1	7.67851	1.36673	0	0
KRT6A	3.54471	20.1749	0	0
LINC02762	3.18823	1.3378	0	0
LOC101929555	15.5517	7.54419	0	0
MAFB	-5.90626	1.00041	-2.43449	-2.34772
MN1	9.70078	4.8374	0	0
NTN1	4.92797	2.80733	5.02944	1.97834
RNF144A	-1.0168	1.06898	5.12439	1.31947
SLC5A9	9.33407	3.92624	-1.02939	1.08919
TNS1	2.61284	-1.72641	0	0
UMODL1	4.47329	-7.85163	150.309	72.781
UMODL1-AS1	58.0265	28.4514	0	0
